# Supplementary material for: LINC00460-miR-149-5p/miR-150-5p-Mutant p53 Feedback Loop Promotes Oxaliplatin Resistance in Colorectal Cancer
Source: PubMed Central journal article supplement — Mol Ther Nucleic Acids. 2020 Oct 15;22:1004–15. doi: 10.1016/j.omtn.2020.10.018 (PMC7679243; doi:10.1016/j.omtn.2020.10.018), 2020-10-15
Supplement: mmc1.pdf [file mmc1.pdf]

OMTN, Volume 22

## **Supplemental Information**

**LINC00460-miR-149-5p/miR-150-5p-Mutant**

**p53 Feedback Loop Promotes Oxaliplatin**

**Resistance in Colorectal Cancer**

**Xiangfeng Meng, Wu Sun, Jing Yu, Yu Zhou, Yuanyuan Gu, Jiayi Han, Likun Zhou, Xiaohong Jiang, and Chen Wang**

## Supplemental Information

### Figure S1

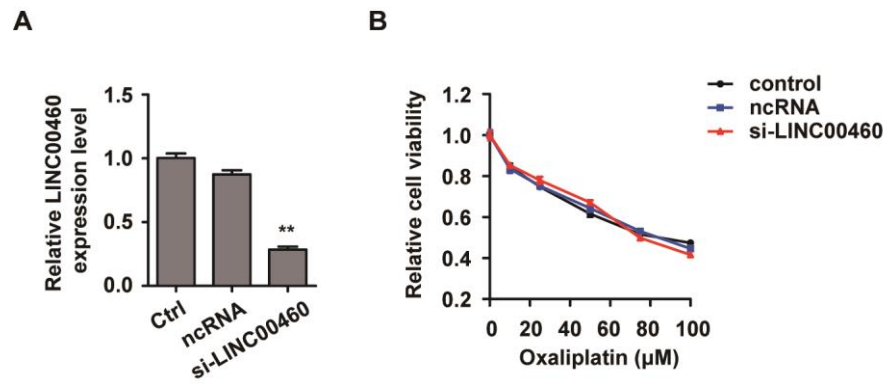

**Figure S1.** Knockdown of LINC00460 in HCT116/OxR cells had little effect on oxaliplatin resistance. (A) Relative expression level of LINC00460 in HCT116/OxR cells after LINC00460 knockdown. (B) CCK8 assays of cell viability in LINC00460-knockdown HCT116/OxR cells following oxaliplatin treatment (0, 10, 25, 50, 75 and 100 $\mu\text{M}$ ). Data were shown as the mean  $\pm$ SD; \*\* $p < 0.01$ .

**Figure S2**

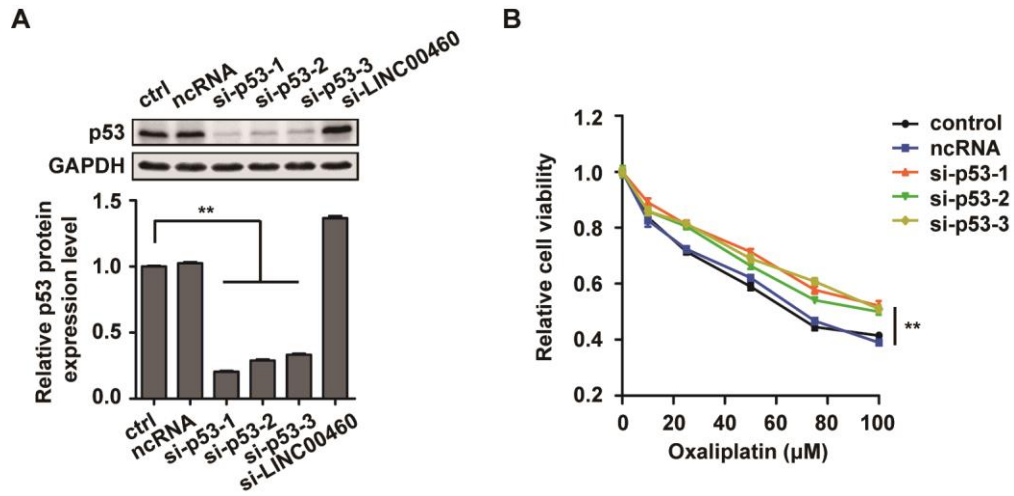

**Figure S2.** Knockdown of p53 in HCT116/OxR cells promoted the oxaliplatin resistance.

(A) p53 protein levels in HCT116/OxR cells transfected with ncRNA, si-p53-1, si-p53-2, si-p53-3 and si-LINC00460 were determined by western blot. Relative p53 protein levels were normalized to GAPDH and compared with the control group. (B) CCK-8 assays of cell viability in p53-knockdown HCT116/OxR cells following oxaliplatin treatment (0, 10, 25, 50, 75 and 100  $\mu$ M). Data were shown as the mean  $\pm$  SD; \*\*p < 0.01.

### Figure S3

273

HCT116/OxR (*TP53* wt): TTTGAGGTG**CG**TGTTTGTGCC

SW480/OxR (*TP53* mut): TTTGAGGTG**CAT**TGTTTGTGCC

309

HCT116/OxR (*TP53* wt): CGAGCACTG**CCA**ACAACACC

SW480/OxR (*TP53* mut): CGAGCACTG**TCC**AACAACACC

**Figure S3.** Two point mutations in the *TP53* gene in SW480/OxR cells.

Sequencing of the fragment containing codons 273 and 309 revealed wild-type (wt, blue) and mutant (mut, red) *TP53* in HCT116/OxR and SW480/OxR cells, respectively.

**Table S1.** Sequences of primers and siRNA & shRNA

| Primers          | Sequence (5'→3')          |
|------------------|---------------------------|
| LINC00460 F:     | GCAGAGTCCTCAAACCAGATAAG   |
| LINC00460 R:     | TTCACATGGTAGACGGTGCAAG    |
| RP11-355I22.7 F: | TCCAGAGGTTCAAGAGAGAGAGAG  |
| RP11-355I22.7 R: | CACCCACATGGAATGTTCTGAAG   |
| LOC339535 F:     | TCTAAGGTGGAGATTACCAGGGTAG |
| LOC339535 R:     | GCAGGTTATGTAGCCACAGACATC  |
| RP11-497G19.2 F: | TCTGGCTTCGGGAGAATCAG      |
| RP11-497G19.2 R: | CAGGCGAGGAAAGGACAATG      |
| RP11-260A9.6 F:  | GCCTGTATCTCCGCATCTGTG     |
| RP11-260A9.6 R:  | AAGATCCTCACCTCCTCCTTAG    |
| RP11-61L23.2 F:  | GGTTTGTGGTTGGCACTGTC      |
| RP11-61L23.2 R:  | GTGGGTGTGGTAGGTTCCATG     |
| LINC00551 F:     | GGTTGGCATCCCAGATGAAG      |
| LINC00551 R:     | CCTTGTCACCTTTGGGTGCAG     |
| FOXF1-AS1 F:     | TGATGGTGGAGGCAGACATTG     |
| FOXF1-AS1 R:     | CAGAAGTCCGAAAGGTGATGAAG   |
| CTD-2245E15.3 F: | CCAGGGAACAAGGATGGAATG     |
| CTD-2245E15.3 R: | CAAGGTAGGGTTTGACCGATG     |
| LOC100506305 F:  | TTCAGGAGAACAGCCCTCTGAG    |
| LOC100506305 R:  | GCTGGAGCCCATCCATTAGAG     |
| LOC389023 F:     | GGAAGCATGGGTCAGAATAAGG    |
| LOC389023 R:     | TTCCTGAAACTTGGAACCGAAG    |
| LOC100505912 F:  | TCGGAAATGACCTCTGATAAACAC  |
| LOC100505912 R:  | AGGACTGCTAAAGTGCAGCTTG    |
| GAPDH F:         | CCACTCCTCCACCTTTGAC       |
| GAPDH R:         | ACCCTGTTGCTGTAGCCA        |
| FOS F:           | TACTACCACTCACCCGCAGA      |
| FOS R:           | CGTGGGAATGAAGTTGGCAC      |
| TRAF1 F:         | TCACCAATGTCACCAGGCG       |
| TRAF1 R:         | TGAAGAGCGACAGATGGGTT      |
| XIAP F:          | TACCGTGCGGTGCTTTAGTT      |
| XIAP R:          | TTTGTAGACTGCGTGGCACT      |
| PDPK1 F:         | AGGCAGCAACATAGAGCAGT      |
| PDPK1 R:         | CGTCCTGTTAGGCAAGGGTT      |
| CENPA F:         | CGCTTCCTCCCATCAACACA      |
| CENPA R:         | AAGTCCACACCACGAGTGAA      |
| GADD45B F:       | GCCCTGCAAATCCACTTCAC      |
| GADD45B R:       | GTGTGAGGGTTCGTGACCAG      |
| ID1 F:           | CCAGCACGTCATCGACTACA      |
| ID1 R:           | GACACAAGATGCGATCGTCC      |
| ID2 F:           | CGACTGCTACTCCAAGCTCAA     |
| ID2 R:           | ATAGTGGGATGCGAGTCCAG      |

| siRNA & shRNA | Sequence (5'→3')      |
|---------------|-----------------------|
| si-p53-1      | CTGCCCTCAACAAGATGTT   |
| si-p53-2      | GGTGAACCTTAGTACCTAA   |
| si-p53-3      | GAAATTTGCGTGTGGAGTA   |
| sh-LINC00460  | GGTACCCAGACATTGTTATGA |
